1 **The draft chromosome-level genome assembly of tetraploid ground cherry**  
2 **(*Prunus fruticosa* Pall.) from long reads**

3

4 Thomas W. Wöhner<sup>1</sup>, Ofere F. Emeriewen<sup>1</sup>, Alexander H.J. Wittenberg<sup>2</sup>, Harrie  
5 Schneiders<sup>2</sup>, Ilse Vrijenhoek<sup>2</sup>, Júlia Halász<sup>3</sup>, Károly Hrotkó<sup>4</sup>, Katharina J. Hoff<sup>5,8</sup>, Lars  
6 Gabriel<sup>5,8</sup>, Jens Keilwagen<sup>6</sup>, Thomas Berner<sup>6</sup>, Mirko Schuster<sup>1</sup>, Andreas Peil<sup>1</sup>, Jens  
7 Wünsche<sup>7</sup>, Stephan Kropop<sup>9</sup>, Henryk Flachowsky<sup>1</sup>

8

9 <sup>1</sup>Julius Kühn Institute (JKI) – Federal Research Centre for Cultivated Plants, Institute  
10 for Breeding Research on Fruit Crops, Pillnitzer Platz 3a, D-01326, Dresden, Germany

11 <sup>2</sup>Keygene N.V., P.O. Box 216, 6700 AE Wageningen, Netherlands

12 <sup>3</sup>Department of Genetics and Plant Breeding, Faculty of Horticultural Science, Szent  
13 István University, Ménesi Str. 44, Budapest 1118, Hungary

14 <sup>4</sup>Department of Floriculture and Dendrology, Institute of Landscape Architecture,  
15 Urban Planning and Ornamental Horticulture, Hungarian University of Agriculture and  
16 Life Science, Villányi Str. 35-43, Budapest 1118, Hungary

17 <sup>5</sup>Institute of Mathematics and Computer Science, University of Greifswald, Walther-  
18 Rathenau-Str. 47, 17489 Greifswald, Germany

19 <sup>6</sup>Julius Kühn Institute (JKI) – Federal Research Centre for Cultivated Plants, Institute  
20 for Biosafety in Plant Biotechnology, Erwin-Baur-Str. 27, D-06484 Quedlinburg,  
21 Germany

22 <sup>7</sup>University of Hohenheim, Institute of Special Crops and Crop Physiology, 70593

23 Stuttgart, Germany

24 <sup>8</sup>Center for Functional Genomics of Microbes, University of Greifswald, Felix-

25 Hausdorff-Str. 8, 17489 Greifswald, Germany

26 <sup>9</sup>Jagdweg 1-3, 01159 Dresden, Germany

27 \*corresponding author: [thomas.woehner@julius-kuehn.de](mailto:thomas.woehner@julius-kuehn.de)

28 **Keywords:**

29 genome assembly, long read, *P. fruticosa*, ground cherry, tetraploid

30

31 **Abstract**

32 Background

33 Cherries are stone fruits and belong to the economically important plant family of  
34 *Rosaceae* with worldwide cultivation of different species. The ground cherry, *Prunus*  
35 *fruticosa* Pall. is one ancestor of cultivated sour cherry, an important tetraploid cherry  
36 species. Here, we present a long read chromosome-level draft genome assembly and  
37 related plastid sequences using the Oxford Nanopore Technology PromethION  
38 platform and R10.3 pore type.

39

40 Finding

41 The final assemblies obtained from 117.3 Gb cleaned reads representing 97x  
42 coverage of expected 1.2 Gb tetraploid ( $2n=4x=32$ ) and 0.3 Gb haploid ( $1n=8$ )

43 genome sequence of *P. fruticosa* were calculated. The N50 contig length ranged  
44 between 0.3 and 0.5 Mb with the longest contig being ~6 Mb. BUSCO estimated a  
45 completeness between 98.7 % for the 4n and 96.1 % for the 1n datasets.  
46 Using a homology and reference based scaffolding method, we generated a final  
47 consensus genome sequence of 366 Mb comprising eight chromosomes. The N50  
48 scaffold was ~44 Mb with the longest chromosome being 66.5 Mb.  
49 The repeat content was estimated to ~190 Mb (52 %) and 58,880 protein-coding  
50 genes were annotated. The chloroplast and mitochondrial genomes were 158,217 bp  
51 and 383,281 bp long, which is in accordance with previously published plastid  
52 sequences.

53

## 54 Conclusion

55 This is the first report of the genome of ground cherry (*P. fruticosa*) sequenced by long  
56 read technology only. The datasets obtained from this study provide a foundation for  
57 future breeding, molecular and evolutionary analysis in *Prunus* studies.

58

## 59 Data Description

### 60 Context

61 Cherries are stone fruits belonging to the important family of *Rosaceae* fruit crops,  
62 which are produced for fresh fruit consumption or industrial processing [1]. The  
63 worldwide production of cherries was 4 million metric tons on an area of 6.7 million  
64 ha [2] in 2019. Nevertheless, cherry production worldwide is threaten by changing

65 climatic conditions, which promote pests, e.g., *Drosophila suzukii* and *Rhagoletis*  
66 *cerasi*, diseases, e.g., *Monilinia laxa* and *Blumeriella jaapii*, as well as unfavourable  
67 abiotic conditions, e.g., hail or late frost [1, 3]. Breeding of new cultivars that are  
68 resistant to biotic stress factors and adapted to local climate conditions could  
69 contribute to sustainable cultivation in the long-term and secure future production.  
70 Donors for breeding and introgression of new characters and traits can be found in  
71 wild/related species of the genus *Prunus* [4–6]. The ground cherry (*Prunus fruticosa*  
72 Pall.) is a wild *Prunus* species with a small shrub-like habitus that is native from middle  
73 Europe to Western Siberia and Western China [7, 8]. The natural habitats vary from  
74 open landscapes with steppe characteristics, the edges of open forests [9–11] or  
75 hillsides with stony soils [12]. *Prunus fruticosa* is a self-incompatible [13] tetraploid  
76 ( $2n=4x=32$ ) species with an estimated genome size of 1.31 pg determined by flow  
77 cytometry analysis [14]. It is the progenitor of sour cherry (*P. cerasus* L.), which  
78 developed by natural hybridization from unreduced pollen of sweet cherry (*P. avium*  
79 L.) with *P. fruticosa* [15, 16]. *Prunus fruticosa* is a valuable genetic resource for  
80 breeding of varieties adapted to drought and low temperatures [17, 18] because of its  
81 growth at cold and semi-arid sites and its edible fruits [7]. Due to its dwarf habitus,  
82 the species has been used as a donor for cherry rootstock breeding in several  
83 programmes [19–21]. Like other *Rosaceae* fruit species, cherries are perennial crops  
84 and breeding of new cultivars is labour intensive and time consuming [22]. Genome  
85 sequencing advances breeding processes enormously by providing insights into  
86 evolution and comparative studies with related species, determining the positions of  
87 putative genes, which may control different traits, and allowing for the possibility for  
88 marker-assisted selection. Hence several genomes of other *Prunus* species [23–30]

89 as well as other members of the *Rosaceae* family [31–33] have been sequenced in  
90 recent years. The sizes of *Prunus* genomes so far sequenced range between 250-300  
91 Mbp with high synteny of the eight basic chromosomes [3]. However, sequencing and  
92 assembling plant genomes is still a challenging task. Although the commercialization  
93 of third-generation sequencing technology has enabled rapid generation of giga-  
94 bases of data, most genome sequences are still fragmented or incomplete due to  
95 size, composition and structure (repeat content) of genomes with many reference  
96 genomes presented as drafts. The availability of long read sequencing technologies  
97 can solve these problems and offers many more advantages [34].

98 In this study, we present a draft assembly of the *P. fruticosa* Pall. genome generated  
99 with long read Oxford Nanopore Technology (ONT). Using the final assembly for  
100 reference based scaffolding, eight chromosome scale pseudomolecules were  
101 constructed and subsequently used for gene annotation. This data provides additional  
102 information, which may be useful for breeding and genetic diversity studies in cherry  
103 and the genus *Prunus* in general.

104

## 105 **Material and Methods**

### 106 *Plant Material, DNA extraction and ONT sequencing*

107 *Prunus fruticosa* Pall. young leaf material (tetraploid, short type, size ca. 30-50 cm)  
108 was collected in its natural habitat [8] from a single tree (in situ) in Budapest,  
109 Hármashatárhegy (Fig. 1, coordinates 47°33'15.322''N, 18°59'49.623''E). Snap frozen  
110 plant material was sent to the sequencing service provider KeyGene N.V.  
111 (Wageningen, The Netherlands) for high molecular weight DNA extraction, purification

112 and nanopore sequencing analysis. High molecular weight DNA was extracted by  
113 KeyGene N.V. using nuclei isolated from frozen leaves ground under liquid nitrogen,  
114 as described elsewhere [35, 36]. Genomic DNA was quality controlled with a Qubit  
115 device (Thermo Fisher Scientific, Waltham, MA, USA) and length was determined  
116 using the Femto Pulse instrument (Agilent, California). Short DNA fragments were  
117 removed using the Circulomics SRE XL kit (Circulomics, Baltimore, MD, USA)  
118 following the manufactures instruction. Finally 2 µg AMPure purified genomic DNA per  
119 flow cell (AMPure PB, Pacific Biosciences, California) was used as input for library  
120 construction using the 1D Genomic DNA ligation SQK\_LSK110 library prep kit (Oxford  
121 Nanopore Technologies, Oxford, UK). Subsequently, the library was loaded on three  
122 PromethION FLO PRO003 (R10.3 pore, early access pore) flow cells and run on  
123 PromethION P24 platform according to the manufacturer's recommendations.  
124 Basecalling was performed in real-time on the compute module (PromethION version:  
125 20.06.9/Guppy4.0.11). Only passed reads with a Q-value threshold of seven were  
126 used for further data analysis.

127

### 128 *De novo assembly and scaffolding*

129 Raw data assembly was performed using a combination of the aligner Minimap2  
130 (2.16-r922) and the assembler Miniasm (0.2-r137-dirty) using a 20x, 30x and 50x  
131 coverage/length cut-offs at default settings. Three runs of Racon (v1.4.10)  
132 subsequently improved base accuracy of the interim contig assembly using a 10 Kb  
133 length cut-off and one run of Medaka (1.01) using all raw reads for consensus calling.  
134 The sequences of the obtained contig assembly were collapsed with two runs of

135 Purge Dups (V1.0.1) using default settings. The BUSCO (Benchmark Universal Single-  
136 Copy Orthologs - Galaxy Version 4.1.4) software was used for quantitative and quality  
137 assessment of the genome assemblies based on near-universal single-copy  
138 orthologs. The genome sequence of *P. avium* 'Tieton' ([37], GenBank assembly  
139 accession: GCA\_014155035.1) was used as a matrix for reference guided scaffolding  
140 of the final assembly (purged2) using RAGOO (v1.11) with the standard settings [38].  
141 Final sequence statistics were calculated with CLC Mainworkbench (v20.0.4). The  
142 generated *P. fruticosa* genome (Pf\_1.0) was hard masked with NCBI WindowMasker  
143 [39] implementation on the CoGe platform [40]. Synteny comparisons between *P.*  
144 *avium* 'Tieton' and *P. persica* 'Lovell' ([24], GenBank assembly accession:  
145 GCA\_000346465.2) with Pf\_1.0 were performed with SynMap2 [41] using the  
146 standard program settings.

147

#### 148 *Annotation*

149 A species-specific repeat library for Pf\_1.0 was first generated with RepeatModeler  
150 1.0.11 [42]. The obtained dataset was then used for repetitive sequence identification  
151 and masking in Pf\_1.0 with RepeatMasker 4.0.7 [43]. As no RNA-seq data for *P.*  
152 *fruticosa* was available, publicly available RNA-seq data [44] from the close relative *P.*  
153 *cerasus* 'Schattenmorelle' (SRR2290965) was downloaded from NCBI and mapped  
154 to Pf\_1.0 using HISAT2 2.1.0 [45].

155 The structural gene annotation of genomic features is result of a combination of ab  
156 initio and homology-based gene annotation. Ab initio gene prediction was performed  
157 with both BRAKER1 [46, 47] and BRAKER2 [48]. The BRAKER pipeline in general

158 leverages extrinsic data, such as spliced alignments from short read RNA-Seq or  
159 large-scale protein to genome alignments for executing self-training GeneMark-ET/EP  
160 [49] [50, 51] with help of SAMtools [52], and BamTools [53], or GeneMark-EP+ [54],  
161 with DIAMOND [55], GeneMark-ES [56], and Spaln2 [57, 58] for generating an  
162 evidence-supported training gene set for the gene finder AUGUSTUS. AUGUSTUS  
163 then predicts genes with evidence where available [59] and in *ab initio* mode in local  
164 absence of evidence [60]. OrthoDB v.10 *Plantae* partition [61] and related species  
165 proteins [*P. armeniaca* (GCA\_903112645.1), *P. persica* (GCF\_000346465.2), *P. mume*  
166 (GCF\_000346735.1), *P. dulcis* (GCF\_902201215.1) and *P. avium* (GCF\_002207925.1)]  
167 obtained from GenBank were used as reference protein dataset for BRAKER2. Gene  
168 predictions from BRAKER1 and BRAKER2 were combined into one transcript set by  
169 filtering the union of transcripts from both predictions in context with their support by  
170 the evidence generated with PrEvCo v. 0.1.0 (<https://github.com/LarsGab/PrEvCo>).  
171 The obtained *ab initio* annotation was augmented with additional GFF attributes using  
172 the GeMoMa module AnnotationEvidence.

173 Homology-based gene annotation was performed with GeMoMa version 1.7.2beta  
174 [62] using the mapped RNA-seq data from ‘Schattenmorelle’ and the genome and  
175 gene annotation from the following reference organisms that are available at NCBI: *A.*  
176 *thaliana* (TAIR10.1, RefSeq GCF\_000001735.4), *M. domestica* (GDDH1,  
177 GCF\_002114115.1), *F. vesca* (FraVesHawai\_1.0, GCF\_000184155.1), *P. avium*  
178 (PAV\_r1.0, GCF\_002207925.1), *P. persica* (Prunus\_persica\_NCBIv2,  
179 GCF\_000346465.2), *P. mume* (P.mume\_V1.0, GCF\_000346735.1), *P. dulcis*



180 (ALMONDv2, GCF\_902201215.1) and *P. armeniaca* (pruArmRojPasHapCUR,  
181 GCA\_903112645.1).

182 The augmented *ab initio* gene annotation from BRAKER and the eight homology-  
183 based gene predictions from GeMoMa were combined using the GeMoMa module  
184 GAF yielding a final gene annotation. BUSCO with set embryophyta\_odb10 (Galaxy  
185 Version 4.1.4) was used for the assessment of protein completeness. For handling  
186 alternative transcripts correctly and not as duplicates, a custom script was ran on the  
187 BUSCO full table, assigning gene ID instead of transcript ID. The functional annotation  
188 was performed with the obtained protein files using InterproScan at Galaxy Europe  
189 using default parameters [63–65] and [66].

190 Noncoding RNA prediction was performed with tRNAscan (Galaxy version 0.4),  
191 Aragorn (Galaxy version 0.6), barnap (Galaxy version 1.2.1) and INFERNAL (cmsearch  
192 with rFAM 11.0, Galaxy Version 1.1.2.0).

193 The chloroplast and mitochondria sequences were annotated with GeSeq [67] using  
194 the references for chloroplast from *P. fruticosa* (GenBank accession MT916286)  
195 published by [68] and mitochondria from *P. avium* (GenBank accession MK816392)  
196 published by [69]. GeSeq pipeline analysis was performed using the annotation  
197 packages ARAGORN, blatN, blatX, Chloe and HMMER.

198

## 199 **Data validation and quality control**

200 We report the use of Oxford Nanopore technology to assemble a high-quality  
201 reference genome of *P. fruticosa* – the first report in a tetraploid *Prunus* species.

202 Previously described genomes in *Prunus* applied Illumina, PacBio or shotgun  
203 sequencing techniques [25, 26, 29]. However, Wang et al. [28] reported a combination  
204 of Oxford Nanopore and Illumina technologies for sweet cherry. Table S1 summarizes  
205 the assembly statistics of our study. We generated 4.5 million raw reads (124.7 Gb),  
206 which is considerably lower compared to the read output of *P. avium* cultivars [25,  
207 28]. After cleaning, approximately 4.0 million reads comprised 117.3 Gb in total (mean  
208  $q = 9.96$ ), which were generated by the R10.3 PromethION flow cells representing  
209  $\sim 97x$  coverage of the estimated tetraploid genome size of 1.2 Gb. Compared to Wang  
210 et al. [28], the R10.3 flow cells produced longer reads with higher quality (Table S1).  
211 A mean of 1,347,740 (SD = 135.304) reads with a N50 length of 41,236 (SD = 275) bp  
212 and 39.1 (SD = 4.2) Gb per flow cell were obtained (Table S1). Based on the results of  
213 the raw data assemblies (Table S2), it was decided to continue with the obtained 30x  
214 coverage Miniasm assembly with a length cut-off at 62.3 kb. After three runs of Racon  
215 and one run of Medaka consensus calling, the final assembly covered approximately  
216 four times the estimated haploid genome size of  $\sim 0.3$  Gb, indicating we were able to  
217 separate the parental haplotypes ( $4n$ ) to a large extent. Consensus calling resulted in  
218 a total assembly size of 1161.5 Mb, represented by 4.426 contigs with an N50 contig  
219 size of 325 Kb and the longest contig almost 5,9 Mb (Table 1). Two runs of Purge  
220 Dups were performed to collapse the haplotype-separated assembly in order to  
221 reduce the duplicated content to a haplotype consensus sequence ( $1n$ ). The  
222 purged\_2x assembly data set has a size of 376,7 Mb and consists 1.275 contigs with  
223 an N50 contig size of 533.426 bp. This assembly was used as input for reference-  
224 guided scaffolding using RaGoo and the genome sequence of *P. avium* 'Tieton' [28].  
225 The obtained sequence file consists of nine scaffolds representing eight

226 chromosomes and one sequence with concatenated unmapped data (unassigned).  
227 The final *Prunus fruticosa* 1.0 genome sequence (Fig. 2) consists of 366,5 Mb with a  
228 N50 size of scaffolds about 43,818.497 bp and G+C of 37.74 %, A+T of 62.22 % and  
229 only 0.03 % gaps (N). The longest scaffold is 66,497,422 bp (Table 2). Compared to  
230 the genome sequences available so far in *Prunus* [24, 25, 28], the genome of *P.*  
231 *fruticosa* is the most complete obtained from long read sequencing only.  
232 BUSCO analysis resulted in 98.6 % - 98.7 % completeness for the representing 4n  
233 Racon and Medaka generated data sets. The comparison of BUSCO results (Fig. 3)  
234 on assembly completeness between the Racon only and the Racon and Medaka data  
235 sets (Table 1) indicates that consensus generation by Medaka increases the number  
236 of duplicated genes (from 89.7 % to 92.4 %) and improves the consensus accuracy.  
237 The obtained assembly sequences (1n) after haplotig removal showed a decrease of  
238 duplicated BUSCOS (from 92.4 % to 12.5 %) and an increase of single BUSCOS (from  
239 6.3 % to 83.6 %). *P. fruticosa* 1.0 results outlined in Figure 3 show a 96.4 %  
240 completeness. Compared to the genome sequence of *P. persica* (99.3 %) and *P.*  
241 *avium* (98.3 %) which represent the highest genome completeness of published  
242 datasets, the obtained long read only assemblies (98.7 %) and consensus genome  
243 sequence (96.4 %) from this study shows a comparably high genome completeness.  
244 Our approach detected 189,7 Mb of repetitive sequences (51.75 % of the genome)  
245 and 42,1 Mb (11.5 %) unknown elements. Repetitive sequences observed in other  
246 *Prunus* species [25–27, 29, 33] ranged from 37.1% in *P. persica* [50] to 59.4 % in *P.*  
247 *avium* [28]. However, similar to *P. avium* [25], the repeated sequences observed in our  
248 study comprised mainly of the class (I) LTR Gypsy retrotransposons and *Copia*. LTR

249 was the most abundant element in our findings with 20.88 % followed by Copia with  
250 7.59 % (Table 3).

251 We employed similar strategy as reported elsewhere namely homology-based, *de*  
252 *novo* and transcriptome supported approaches [28, 37] to call repeats, predict  
253 protein-coding genes and perform functional annotation. Using RNA-Seq data from  
254 *P. cerasus* 'Schattenmorelle' [44] and the augmented gene predictions from BRAKER  
255 with eight homology-based gene predictions from GeMoMa we predicted 58.880  
256 protein-coding transcripts representing 84.524 orthologs within Pf\_1.0 with a mean  
257 length of 3.580 bp and a mean protein length of 355 aa (Table 4). The number of  
258 protein-coding transcripts was considerably larger in this study than 38.275 predicted  
259 for *P. avium* 'Tieton' [28] and 43.349 transcripts predicted in *P. avium* 'Satonishiki'  
260 [25]. A total of 86.7 % (75,113) proteins was functionally annotated by InterproScan  
261 resulting in 852.470 annotated protein domains and sites from 15 protein databases  
262 (Table 4). A total of 2.301 (Aragorn) and 2.559 (tRNA scan) tRNA and 576 rRNA  
263 sequences were detected. Infernal search reveals 36.757 consensus RNA secondary  
264 structure profiles. BUSCO analysis for transcriptome completeness  
265 (embryophyta\_odb10 dataset) reveals 1,552 (96.2 %) complete (81.8 % single and  
266 complete, 14.4 % duplicated and complete) and 62 (3.8 %) fragmented (1.7 %) or  
267 missing (2.1 %) BUSCOs (Fig. 4).

268 The obtained chloroplast genome sequence (Fig. 5a) was 158,130 bp long (GC 36.6  
269 %) with a typical quadripartite structure consisting a large (86,242 bp) and a small  
270 (19,143) single-copy region and two inverted repeats (IRA 26,372 bp, IRB 26,373 bp).  
271 The GC contents of each region were 34.1 % (LSC), 30.1 % (SSC) and 42.5 % for IRA

272 and IRB each. The size, the structure and the GC content values are similar to those  
273 reported previously for the chloroplast genome of *P. fruticosa* (Yang et al. 2020).  
274 Forty-five tRNA (ARAGORN), eight rRNA (each with HMMER and blatN) and 116  
275 protein-coding genes (HMMER) were annotated.

276 We present for the first time a mitochondrial genome for *P. fruticosa* (Fig. 5b) with a  
277 length of 383,281 bp and a GC content of 45.7 %. The results of the mitochondria  
278 genome is similar to the mitochondria genome of *P. avium* 'Summit' [69] where a total  
279 of 68 protein coding genes, including 27 tRNA (ARAGORN) and two rRNA (blatN) were  
280 annotated.

281 We compared sequence synteny between *P. fruticosa* and *P. persica* and *P. fruticosa*  
282 and *P. avium* (Fig. 6). The synteny analysis involved at least two transcripts of  
283 annotated genes in each representative genome (Fig. 6a). As indicated in Table S3, a  
284 higher percentage of transcripts (77.5 % to 87.3 %) were mapped between the  
285 homologues chromosomes from *P. persica* and Pf\_1.0 compared to the transcripts  
286 from *P. avium* (72.1% to 56.3 %). In general, the assembled genome of *P. fruticosa*  
287 shows a good synteny with the genomes of *P. persica* [24] and *P. avium* [28]. Figure  
288 6b shows the synteny analysis using masked sequences (i.e. without repetitive  
289 sequences). The results obtained confirm strong synteny between the compared  
290 genomes and strongly suggest the high quality of the obtained genome sequence.

## 291 **Re-use potential**

292 For the first time, we report a draft genome scale-assembly of tetraploid *Prunus*  
293 species. This was achieved using Nanopore sequencing technology, confirming that  
294 this technology alone can sufficiently produce a high-quality genome without

295 additional sequencing using Illumina [70]. This genome will be valuable in exploiting  
296 genetic information for breeding programs; will enhance our understanding of  
297 genetics of this species relative to breeding as well as molecular and evolutionary  
298 analysis in the genus *Prunus*.

299

### 300 **Data Availability**

301 Data supporting the findings of this study are deposited into the Open Agrar repository  
302 [71] and on personal request to the corresponding author. The ground cherry genome  
303 has been submitted to NCBI and is available after review.

### 304 **Competing interests**

305 The R10.3 flow cells were provided by Keygene for the project. Keygene wanted to  
306 gain experience with this new flow cells on a biologically difficult object. Keygene had  
307 no influence on the interpretation of the results and the writing of the manuscript.

### 308 **Authors' contribution**

309 TW, OE wrote the manuscript. AW, HS and IV performed DNA isolation, sequencing  
310 and genome assembly. JH and KH provided the plant material. KH, JK, LG and TB  
311 performed annotation of the dataset. SK performed the scaffolding and TW the did  
312 the interproscan and synteny analysis. HF, JW, MS and AP conceived the study and  
313 made substantial contributions to its design, acquisition, analysis and interpretation  
314 of data. All authors contributed equally to the finalization of the manuscript.

315

### 316 **Figures**

317 Figure 1 Morphology of *P. fruticosa* Pall.. (a) flowering habitus, (b) inflorescence, (c)  
318 mature shrub in the natural habitat in Hungary and (d) leafs and fruits.

319 Figure 2 The genome of *P. fruticosa*. Circos plot of the 8 pseudomolecules. (a)  
320 Chromosome length (Mb); (b) gene density in blocks of 1 MB; (c) repeat density in  
321 blocks of 1 Mb.

322 Figure 3 Analysis of completeness of different *P. fruticosa* datasets compared to *P.*  
323 *avium* cv. Tieton and *P. persica* cv. Lovell by mapping of a set of universal single-copy  
324 orthologs using BUSCO. The bar charts indicate complete single copy (orange),  
325 complete duplicated (gray), fragmented (yellow) and missing (blue) genes. For  
326 evaluation the embryophyta\_odb10 BUSCO dataset (n=1614) was used. *P. fruticosa*  
327 1.0 show a 96.4 % completeness (S: 94.1 %, D: 2.3 %, F: 1.3 %, M: 2.3 %, n: 1614)  
328 which almost reaches the completeness of *P. avium* cv. 'Tieton' (C: 98.3 %, S: 95.6  
329 %, D: 2.7 %, F: 0.5 %, M:1.5 %, n:1614) and *P. persica* 'Lovell' (C: 99.3 %, S: 97.5  
330 %, D: 1.8%, F: 0.1 %, M: 0.6 %, n:1614).

331 Figure 4 Analysis of completeness of different protein sets obtained with different  
332 structural annotation strategies. The bar charts indicate complete single copy  
333 (orange), complete duplicated (gray), fragmented (yellow) and missing (blue) genes.  
334 For evaluation the embryophyta\_odb10 BUSCO dataset (n=1614) was used.

335 Figure 5 The chloroplast (a) and mitochondrial (b) genome sequence of *P. fruticosa*  
336 1.0 obtained from the contigs utg000088l and utg001396l in the medaka assembly  
337 sequence. Annotation was performed using GeSeq (Tillich et al. 2017).

338 Figure 6 Synteny between *P. fruticosa*, *P. persica* 'Lovell' and *P. avium* 'Tieton'. (a)  
339 Circos plots showing transcripts of *P. persica* (Pp, left) and *P. avium* (Pa, right) anno-  
340 tated in *P. fruticosa* (Pf). Each string represents at least two transcripts in a 50k bp  
341 cluster. (b) Syntenic dot plot of the nucleotide sequences between *P. fruticosa*, *P.*  
342 *persica* and *P. avium*. Before plotting, the sequences were hard masked by the NCBI  
343 window maker implication on the CoGe webpage. Several inversions (arrows) and  
344 out-paralogs (circles) were identified between the sequences.

## 345 **Tables**

346 Table 1 Statistics of different datasets and assemblies from *P. fruticosa*

347 Table 2 Pseudomolecule statistics for Pf\_1.0

348 Table 3 Characterization of repetitive sequences of *P. fruticosa* 1.0

349 Table 4 Functional annotation results generated by interproscan using BRAKER &  
350 GeMoMa combination of ab-initio and homology-based structural gene annotation  
351 and statistics

## 352 **Supplemental**

353 Table S1 Statistics of three different datasets for *P. fruticosa* generated with R10.3  
354 PromethION cells (passed reads)

355 Table S2 Assembly statistics of tetraploid *P. fruticosa*

356 Table S3a Matrix of shared number of transcripts annotated from *P. avium* (Pa) and  
357 *P. persica* (Pp) to *P. fruticosa* (Pf) Pf\_1.0 within each chromosomes



358 Table S3b Matrix of shared number of transcript in percent annotated from *P. avium*  
359 (*Pa*) and *P. persica* (*Pp*) to *P. fruticosa* (*Pf*) Pf\_1.0 within each chromosomes

360

## 361 **References**

- 362 1. Quero-Garcia J, Iezzoni A, Lopez-Ortega G, Peace C, Fouche M, Dirlwanger E,  
363 Schuster M. Advances and challenges in cherry breeding 2019: Burleigh Dodds  
364 Science Publishing.
- 365 2. FAO. Crops. 2021. <http://www.fao.org/faostat/en/#data/QC/>. Accessed 17 Feb  
366 2021.
- 367 3. Aranzana MJ, Decroocq V, Dirlwanger E, Eduardo I, Gao ZS, Gasic K, et al.  
368 Prunus genetics and applications after de novo genome sequencing:  
369 achievements and prospects. Horticulture research. 2019;6:1–25.
- 370 4. Schuster M, Grafe C, Hoberg E, Schütze W. Interspecific hybridization in sweet  
371 and sour cherry breeding. Acta horticulturae. 2013.
- 372 5. Wen J, Berggren ST, Lee C-H, Ickert-Bond S, Yi T-S, Yoo K-O, et al.  
373 Phylogenetic inferences in Prunus (Rosaceae) using chloroplast ndhF and  
374 nuclear ribosomal ITS sequences. J Syst Evol. 2008;46:322–32.
- 375 6. Stegmeir T, Schuster M, Sebolt A, Rosyara U, Sundin GW, Iezzoni A. Cherry leaf  
376 spot resistance in cherry (*Prunus*) is associated with a quantitative trait locus on

- 377 linkage group 4 inherited from *P. canescens*. *Molecular breeding*. 2014;34:927–  
378 35.
- 379 7. Faust M, Surányi D. Origin and dissemination of cherry. *Horticultural Reviews*.  
380 1997;19:263–317.
- 381 8. Hrotkó K, Feng Y, Halász J. Spontaneous hybrids of *Prunus fruticosa* Pall. in  
382 Hungary. *Genetic Resources and Crop Evolution*. 2020;67:489–502.
- 383 9. Jäger EJ, Seidel D. Unterfamilie Prunoideae. *Hegi Illustrierte Flora von*  
384 *Mitteleuropa*. 1995;4.
- 385 10. Meusel H, Jäger EJ, Weinert E. *Vergleichende chorologie der*  
386 *zentraleuropaischen flora*. 1965.
- 387 11. Macková L, Vít P, Urfus T. Crop-to-wild hybridization in cherries—Empirical  
388 evidence from *Prunus fruticosa*. *Evolutionary applications*. 2018;11:1748–59.
- 389 12. Mratinić E, Kojić M. *Wild fruit species of Serbia*. Agricultural Research Institute of  
390 Serbia, Belgrade. 1998.
- 391 13. Pruski K. Tissue culture propagation of Mongolian cherry (*Prunus fruticosa* L.)  
392 and Nanking cherry (*Prunus tomentosa* L.). In: *Protocols for micropropagation of*  
393 *woody trees and fruits*: Springer; 2007. p. 391–407.
- 394 14. Macková L, Vít P, Ďurišová L, Eliáš P, Urfus T. Hybridization success is largely  
395 limited to homoploid *Prunus* hybrids: a multidisciplinary approach. *Plant*  
396 *Systematics and Evolution*. 2017;303:481–95.

- 397 15. Olden EJ, Nybom N. On the origin of *Prunus cerasus* L. *Hereditas*. 1968;59:327–  
398 45.
- 399 16. Brettin TS, Karle R, Crowe EL, af lezzoni. Chloroplast Inheritance and DNA  
400 Variation in Sweet, Sour, and Ground Cherry. *The Journal of heredity*.  
401 2000;91:75–9.
- 402 17. Mitschurin IW. *Ausgewählte Schriften 1951*. In: Verlag Kultur und Fortschritt,  
403 editor. *Ausgewählte Schriften 1951*.
- 404 18. Bors RH. Dwarf sour cherry breeding at the University of Saskatchewan. *Acta*  
405 *horticulturae*. 2005.
- 406 19. Cummins JN. Vegetatively propagated selections of *Prunus fruticosa* as  
407 dwarfing stocks for cherry. *Fruit Var Hort Dig*. 1972.
- 408 20. Plock H. Bedeutung der *Prunus fruticosa* Pall. als Zwergunterlage für Süss- und  
409 Sauerkirschen. *Mitt Rebe Wein Obstbau Fruchtverwert*. 1973.
- 410 21. Hein K. Zwischenbericht über eine Prüfung der Steppenkirsche (*P. fruticosa*) und  
411 anderen Süßkirschenunterlagen und Unterlagenkombinationen. *Erwerbsobstbau*.  
412 1979;21:219.
- 413 22. Peace C, Norelli J. Genomics approaches to crop improvement in the Rosaceae.  
414 In: *Genetics and genomics of Rosaceae*: Springer; 2009. p. 19–53.

- 415 23. Ahmad R, Parfitt DE, Fass J, Ogundiwin E, Dhingra A, Gradziel TM, et al. Whole  
416 genome sequencing of peach (*Prunus persica* L.) for SNP identification and  
417 selection. *BMC genomics*. 2011;12:1–7.
- 418 24. Verde I, Jenkins J, Dondini L, Micali S, Pagliarani G, Vendramin E, et al. The  
419 Peach v2. 0 release: high-resolution linkage mapping and deep resequencing  
420 improve chromosome-scale assembly and contiguity. *BMC genomics*.  
421 2017;18:1–18.
- 422 25. Shirasawa K, Isuzugawa K, Ikenaga M, Saito Y, Yamamoto T, Hirakawa H, Isobe  
423 S. The genome sequence of sweet cherry (*Prunus avium*) for use in genomics-  
424 assisted breeding. *DNA Research*. 2017;24:499–508.
- 425 26. Baek S, Choi K, Kim G-B, Yu H-J, Cho A, Jang H, et al. Draft genome sequence  
426 of wild *Prunus yedoensis* reveals massive inter-specific hybridization between  
427 sympatric flowering cherries. *Genome biology*. 2018;19:1–17.
- 428 27. Shirasawa K, Esumi T, Hirakawa H, Tanaka H, Itai A, Ghelfi A, et al. Phased  
429 genome sequence of an interspecific hybrid flowering cherry, ‘Somei-  
430 Yoshino’ (*Cerasus* × *yedoensis*). *DNA Research*. 2019;26:379–89.
- 431 28. Wang J, Liu W, Zhu D, Hong P, Zhang S, Xiao S, et al. Chromosome-scale  
432 genome assembly of sweet cherry (*Prunus avium* L.) cv. Tieton obtained using  
433 long-read and Hi-C sequencing. *Horticulture research*. 2020;7:1–11.
- 434 29. Zhang Q, Chen W, Sun L, Zhao F, Huang B, Yang W, et al. The genome of  
435 *Prunus mume*. *Nature communications*. 2012;3:1–8.

- 436 30. Callahan AM, Zhebentyayeva TN, Humann JL, Saski CA, Galimba KD, Georgi LL,  
437 et al. Defining the 'HoneySweet' insertion event utilizing NextGen sequencing and  
438 a de novo genome assembly of plum (*Prunus domestica*). *Horticulture*  
439 *research*;8:8.
- 440 31. Velasco R, Zharkikh A, Affourtit J, Dhingra A, Cestaro A, Kalyanaraman A, et al.  
441 The genome of the domesticated apple (*Malus domestica* Borkh.). *Nature*  
442 *genetics*. 2010;42:833–9.
- 443 32. Daccord N, Celton J-M, Linsmith G, Becker C, Choisne N, Schijlen E, et al. High-  
444 quality de novo assembly of the apple genome and methylome dynamics of  
445 early fruit development. *Nature genetics*. 2017;49:1099–106.
- 446 33. Jiang F, Zhang J, Wang S, Yang L, Luo Y, Gao S, et al. The apricot (*Prunus*  
447 *armeniaca* L.) genome elucidates Rosaceae evolution and beta-carotenoid  
448 synthesis. *Horticulture research*. 2019;6:1–12.
- 449 34. Jain M, Olsen HE, Paten B, Akeson M. The Oxford Nanopore MinION: delivery of  
450 nanopore sequencing to the genomics community. *Genome biology*. 2016;17:1–  
451 11.
- 452 35. Zhang M, Zhang Y, Scheuring CF, Wu C-C, Dong JJ, Zhang H-B. Preparation of  
453 megabase-sized DNA from a variety of organisms using the nuclei method for  
454 advanced genomics research. *nature protocols*. 2012;7:467–78.

- 455 36. Datema E, Hulzink RJM, Blommers L, Valle-Inclan JE, van Orsouw N, Wittenberg  
456 AHj, Vos M de. The megabase-sized fungal genome of *Rhizoctonia solani*  
457 assembled from nanopore reads only. *BioRxiv*. 2016:84772.
- 458 37. Liu C, Feng C, Peng W, Hao J, Wang J, Pan J, He Y. Chromosome-level draft  
459 genome of a diploid plum (*Prunus salicina*). *GigaScience*. 2020;9:giaa130.
- 460 38. Alonge M, Soyk S, Ramakrishnan S, Wang X, Goodwin S, Sedlazeck FJ, et al.  
461 RaGOO: fast and accurate reference-guided scaffolding of draft genomes.  
462 *Genome biology*. 2019;20:1–17.
- 463 39. Morgulis A, Gertz EM, Schäffer AA, Agarwala R. WindowMasker: window-based  
464 masker for sequenced genomes. *Bioinformatics*. 2006;22:134–41.
- 465 40. Lyons EH. CoGe, a new kind of comparative genomics platform: Insights into the  
466 evolution of plant genomes: University of California, Berkeley; 2008.
- 467 41. Haug-Baltzell A, Stephens SA, Davey S, Scheidegger CE, Lyons E. SynMap2  
468 and SynMap3D: web-based whole-genome synteny browsers. *Bioinformatics*.  
469 2017;33:2197–8.
- 470 42. Smit AF, Hubley R, Green P. RepeatModeler Open-1.0. 2008–2015. Seattle,  
471 USA: Institute for Systems Biology. Available from: <httpwww.repeatmasker.org>,  
472 Last Accessed May. 2015;1:2018.
- 473 43. Smit AF, Hubley R, Green P. RepeatMasker Open-4.0. 2013–2015 2015.

- 474 44. Jo Y, Chu H, Cho JK, Choi H, Lian S, Cho WK. De novo transcriptome assembly  
475 of a sour cherry cultivar, Schattenmorelle. *Genomics data*. 2015;6:271–2.
- 476 45. Kim D, Paggi JM, Park C, Bennett C, Salzberg SL. Graph-based genome  
477 alignment and genotyping with HISAT2 and HISAT-genotype. *Nature*  
478 *biotechnology*. 2019;37:907–15.
- 479 46. Hoff KJ, Lange S, Lomsadze A, Borodovsky M, Stanke M. BRAKER1:  
480 unsupervised RNA-Seq-based genome annotation with GeneMark-ET and  
481 AUGUSTUS. *Bioinformatics*. 2016;32:767–9.
- 482 47. Hoff KJ, Lomsadze A, Borodovsky M, Stanke M. Whole-genome annotation with  
483 BRAKER. In: *Gene prediction*: Springer; 2019. p. 65–95.
- 484 48. Brůna T, Hoff KJ, Lomsadze A, Stanke M, Borodovsky M. BRAKER2: Automatic  
485 eukaryotic genome annotation with GeneMark-EP+ and AUGUSTUS supported  
486 by a protein database. *NAR Genomics and Bioinformatics*. 2021;3:lqaa108.
- 487 49. Lomsadze A, Burns PD, Borodovsky M. Integration of mapped RNA-Seq reads  
488 into automatic training of eukaryotic gene finding algorithm. *Nucleic acids*  
489 *research*. 2014;42:e119–e119.
- 490 50. Verde I, Abbott AG, Scalabrin S, Jung S, Shu S, Marroni F, et al. The high-quality  
491 draft genome of peach (*Prunus persica*) identifies unique patterns of genetic  
492 diversity, domestication and genome evolution. *Nature genetics*. 2013;45:487–  
493 94.

- 494 51. Verde I, Abbott AG, Scalabrin S, Jung S, Shu S, Marroni F, et al. The high-quality  
495 draft genome of peach (*Prunus persica*) identifies unique patterns of genetic  
496 diversity, domestication and genome evolution. *Nature genetics*. 2013;45:487–  
497 94.
- 498 52. Li H, Handsaker B, Wysoker A, Fennell T, Ruan J, Homer N, et al. The sequence  
499 alignment/map format and SAMtools. *Bioinformatics*. 2009;25:2078–9.
- 500 53. Barnett DW, Garrison EK, Quinlan AR, Strömberg MP, Marth GT. BamTools: a  
501 C++ API and toolkit for analyzing and managing BAM files. *Bioinformatics*.  
502 2011;27:1691–2.
- 503 54. Brúna T, Lomsadze A, Borodovsky M. GeneMark-EP+: Eukaryotic Gene  
504 Prediction With Self-Training in the Space of Genes and Proteins. *NAR*  
505 *Genomics and Bioinformatics*. 2020;2:lqaa026.
- 506 55. Buchfink B, Xie C, Huson DH. Fast and Sensitive Protein Alignment Using  
507 DIAMOND. *Nature methods*. 2015;12:59–60.
- 508 56. Lomsadze A, Ter-Hovhannisyan V, Chernoff YO, Borodovsky M. Gene  
509 identification in novel eukaryotic genomes by self-training algorithm. *Nucleic*  
510 *acids research*. 2005;33:6494–506.
- 511 57. Iwata H, Gotoh O. Benchmarking spliced alignment programs including Spaln2,  
512 an extended version of Spaln that incorporates additional species-specific  
513 features. *Nucleic acids research*. 2012;40:e161-e161.



- 514 58. Gotoh O, Morita M, Nelson DR. Assessment and refinement of eukaryotic gene  
515 structure prediction with gene-structure-aware multiple protein sequence  
516 alignment. *Bmc Bioinformatics*. 2014;15:1–13.
- 517 59. Stanke M, Diekhans M, Baertsch R, Haussler D. Using native and syntenically  
518 mapped cDNA alignments to improve de novo gene finding. *Bioinformatics*.  
519 2008;24:637–44.
- 520 60. Stanke M, Schöffmann O, Morgenstern B, Waack S. Gene prediction in  
521 eukaryotes with a generalized hidden Markov model that uses hints from  
522 external sources. *Bmc Bioinformatics*. 2006;7:1–11.
- 523 61. Kriventseva EV, Kuznetsov D, Tegenfeldt F, Manni M, Dias R, Simão FA,  
524 Zdobnov EM. OrthoDB v10: sampling the diversity of animal, plant, fungal,  
525 protist, bacterial and viral genomes for evolutionary and functional annotations  
526 of orthologs. *Nucleic acids research*. 2019;47:D807–D811.
- 527 62. Keilwagen J, Hartung F, Grau J. GeMoMa: Homology-based gene prediction  
528 utilizing intron position conservation and RNA-seq data. In: *Gene Prediction*:  
529 Springer; 2019. p. 161–177.
- 530 63. Cock PJA, Grüning BA, Paszkiewicz K, Pritchard L. Galaxy tools and workflows  
531 for sequence analysis with applications in molecular plant pathology. *PeerJ*.  
532 2013;1:e167.
- 533 64. Zdobnov EM, Apweiler R. InterProScan: protein domains identifier.  
534 *Bioinformatics (Oxford, England)*. 2001;17:847–8.

- 535 65. Quevillon E, Silventoinen V, Pillai S, Harte N, Mulder N, Apweiler R, Lopez R.  
536 InterProScan: protein domains identifier. *Nucleic acids research*. 2005;33:W116-  
537 W120.
- 538 66. Hunter S, Apweiler R, Attwood TK, Bairoch A, Bateman A, Binns D, et al.  
539 InterPro: the integrative protein signature database. *Nucleic acids research*.  
540 2009;37:D211-D215.
- 541 67. Tillich M, Lehwark P, Pellizzer T, Ulbricht-Jones ES, Fischer A, Bock R, Greiner  
542 S. GeSeq—versatile and accurate annotation of organelle genomes. *Nucleic acids*  
543 *research*. 2017;45:W6-W11.
- 544 68. Yang Y-X, Tian M-H, Liu X-H, Li Y, Sun Z-S. Complete chloroplast genome of  
545 *Prunus fruticosa* and its implications for the phylogenetic position within *Prunus*  
546 *sensulato* (Rosaceae). *Mitochondrial DNA Part B*. 2020;5:3624–6.
- 547 69. Yan M, Zhang X, Zhao X, Yuan Z. The complete mitochondrial genome  
548 sequence of sweet cherry (*Prunus avium* cv. 'summit'). *Mitochondrial DNA Part*  
549 *B*. 2019;4:1996–7.
- 550 70. Huang Y-T, Liu P-Y, Shih P-W. High-Quality Genomes of Nanopore Sequencing  
551 by Homologous Polishing. *BioRxiv*. 2020.
- 552 71. Wöhner TW, Emeriewen OF, Wittenberg AHj, Schneiders H, Vrijenhoek I, Halász  
553 J, et al. Supporting materials for - The draft chromosome-level genome  
554 assembly of tetraploid ground cherry (*Prunus fruticosa* Pall.) from long reads.

555 2021. [https://www.openagrar.de/receive/openagrar\\_mods\\_00070329](https://www.openagrar.de/receive/openagrar_mods_00070329). Accessed

556 1 Jun 2021.

557

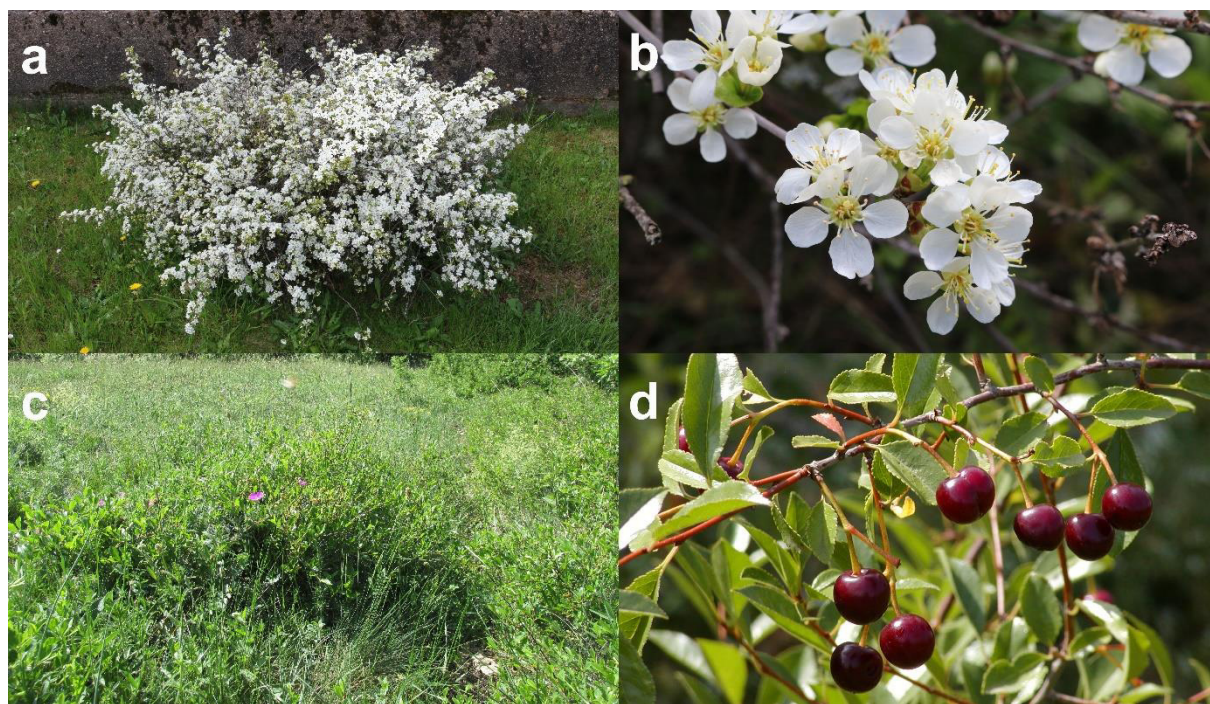

Figure 1 Morphology of *P. fruticosa* Pall.. (a) flowering habitus, (b) inflorescence, (c) mature shrub in the natural habitat in Hungary and (d) leaves and fruits.

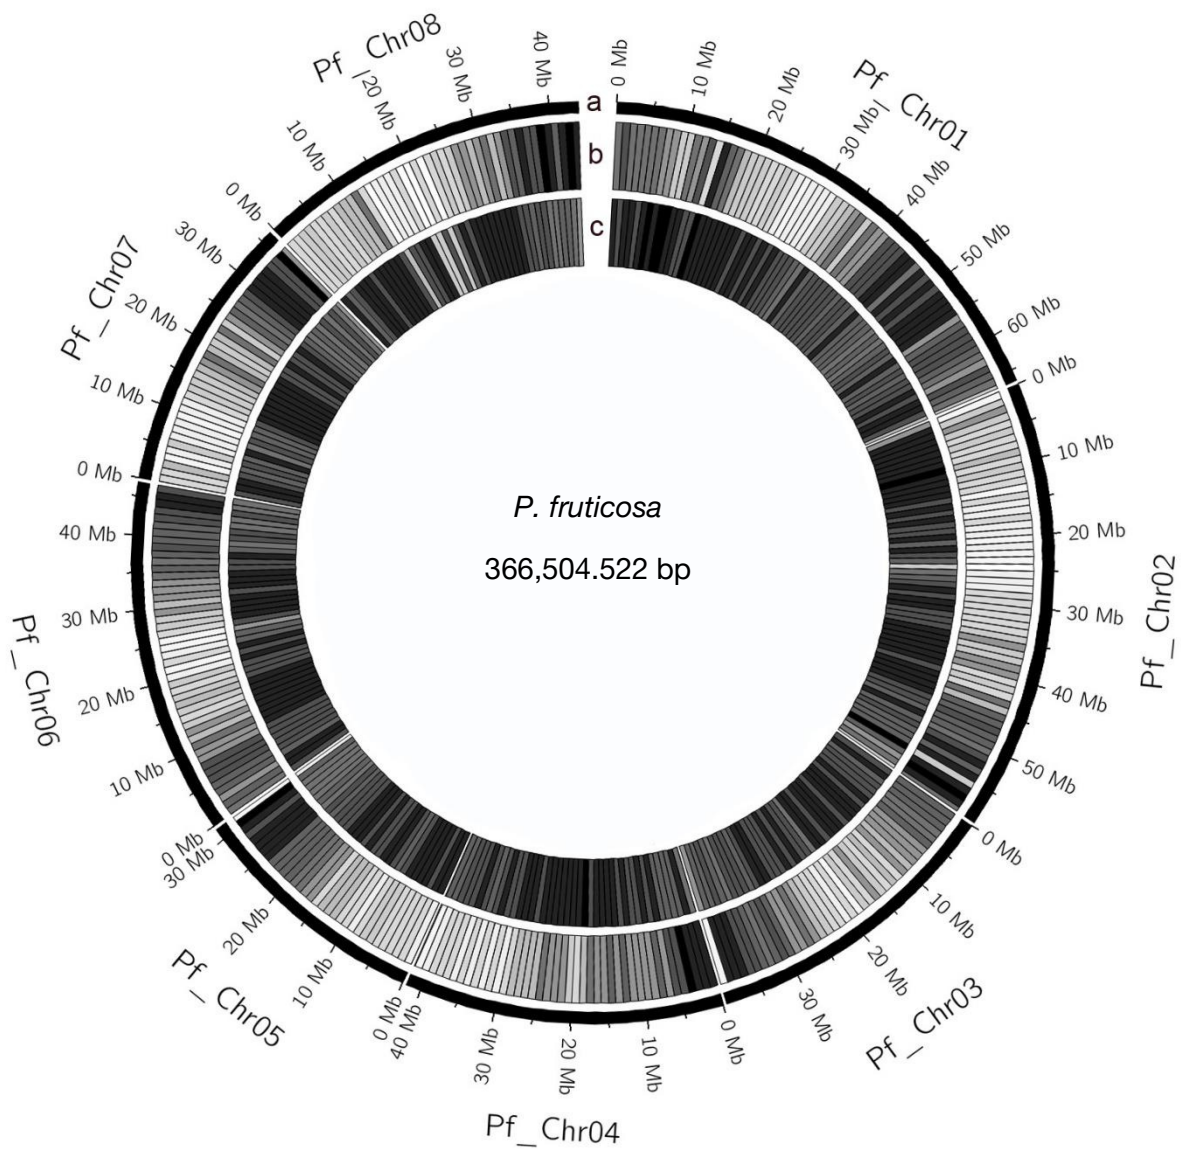

Figure 2 The genome of *P. fruticosa*. Circos plot of the 8 pseudomolecules. (a) Chromosome length (Mb); (b) gene density in blocks of 1 MB; (c) repeat density in blocks of 1 Mb.

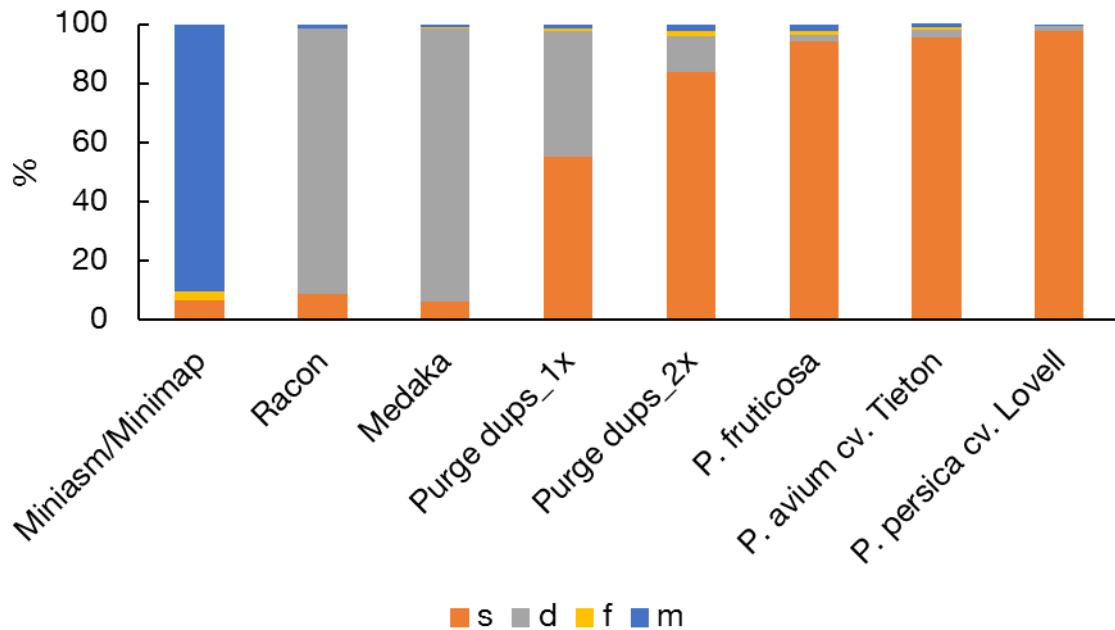

Figure 3 Analysis of completeness of different *P. fruticosa* datasets compared to *P. avium* cv. Tieton and *P. persica* cv. Lovell by mapping of a set of universal single-copy orthologs using BUSCO. The bar charts indicate complete single copy (orange), complete duplicated (gray), fragmented (yellow) and missing (blue) genes. For evaluation the embryophyta\_odb10 BUSCO dataset (n=1614) was used. *P. fruticosa* 1.0 show a 96.4 % completeness (S: 94.1 %, D: 2.3 %, F: 1.3 %, M: 2.3 %, n: 1614) which almost reaches the completeness of *P. avium* cv. 'Tieton' (C: 98.3 %, S: 95.6 %, D: 2.7 %, F: 0.5 %, M: 1.5 %, n: 1614) and *P. persica* 'Lovell' (C: 99.3 %, S: 97.5 %, D: 1.8%, F: 0.1 %, M: 0.6 %, n: 1614).



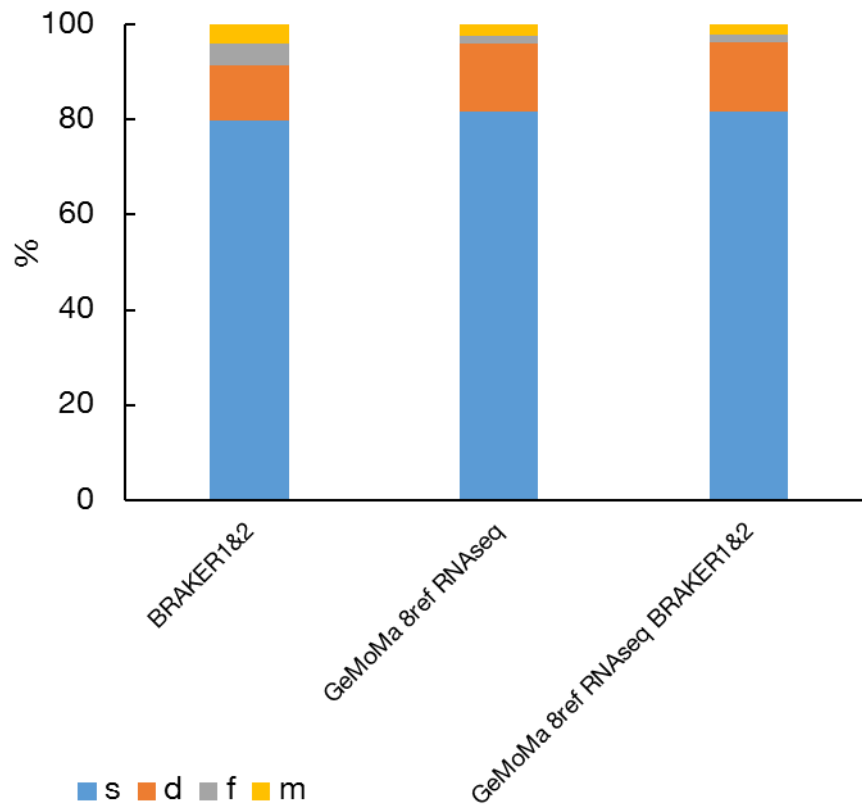

Figure 4 Analysis of completeness of different protein sets obtained with different structural annotation strategies. The bar charts indicate complete single copy (orange), complete duplicated (gray), fragmented (yellow) and missing (blue) genes. For evaluation the embryophyta\_odb10 BUSCO dataset (n=1614) was used.

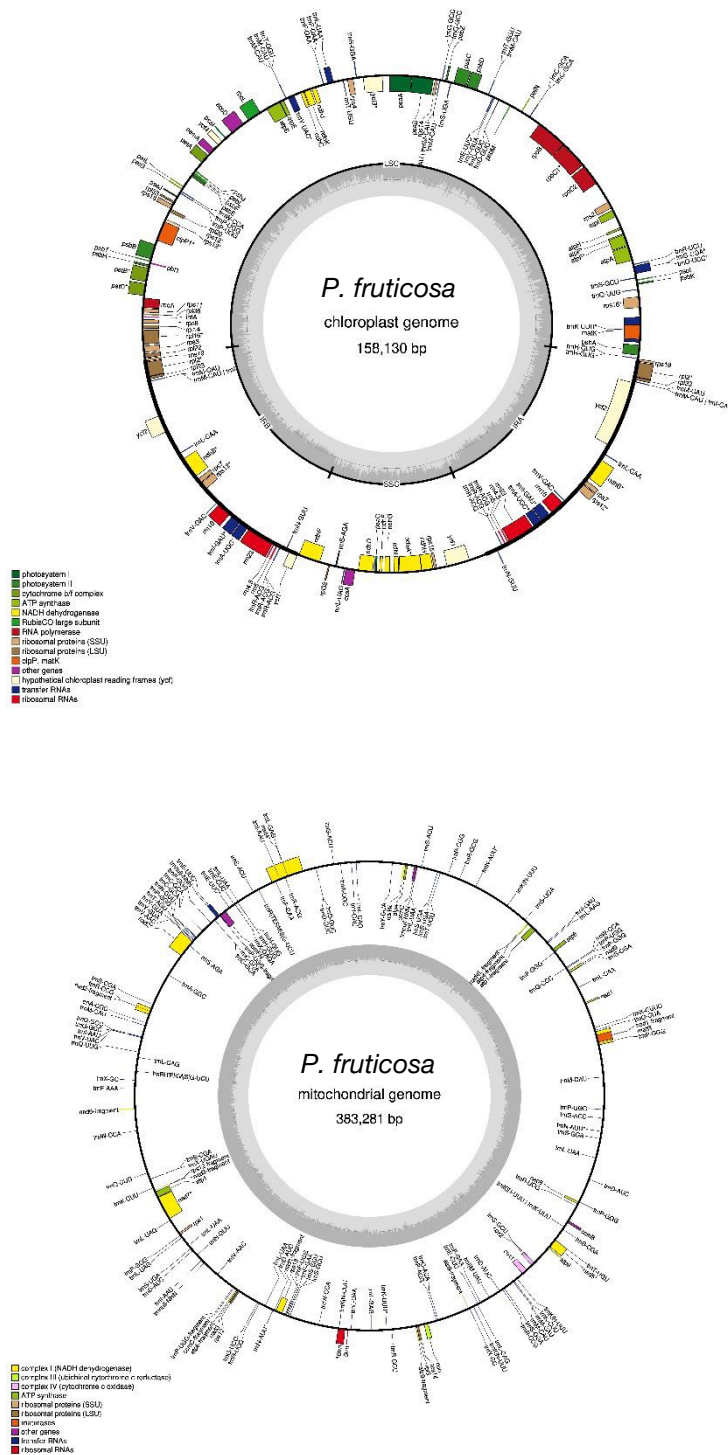

Figure 5 The chloroplast (a) and mitochondrial (b) genome sequence of *P. fruticosa* 1.0 obtained from the contigs utg000088l and utg001396l in the medaka assembly sequence. Annotation was performed using GeSeq (Tillich et al. 2017).



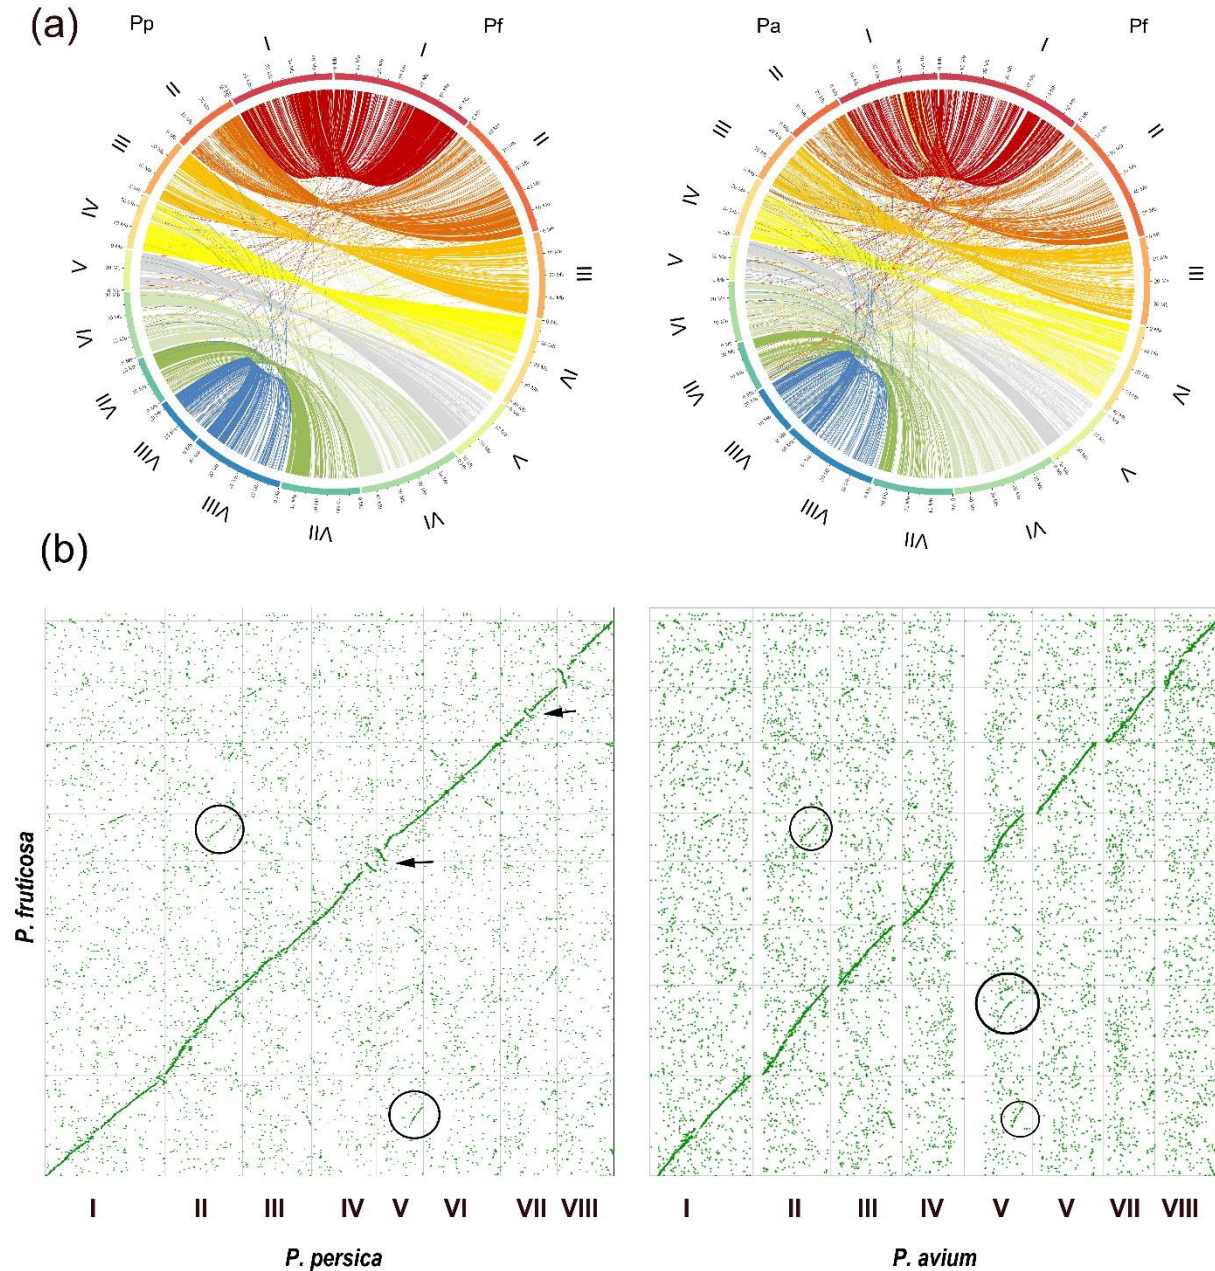

Figure 6 Synteny between *P. fruticosa*, *P. persica* 'Lovell' and *P. avium* 'Tieton'. (a) Circos plots showing transcripts of *P. persica* (Pp, left) and *P. avium* (Pa, right) annotated in *P. fruticosa* (Pf). Each string represents at least two transcripts in a 50k bp cluster. (b) Syntenic dot plot of the nucleotide sequences between *P. fruticosa*, *P. persica* and *P. avium*. Before plotting, the sequences were hard masked by the NCBI window maker implication on the CoGe webpage. Several inversions (arrows) and out-paralogs (circles) were identified between the sequences.

Table 1 Statistics of different datasets and assemblies from *P. fruticosa*

| Data set / assembly | Ploidy | Number of contigs | Contig N50 (bp) | Longest contig (bp) | Total contig length (Mb) |
|---------------------|--------|-------------------|-----------------|---------------------|--------------------------|
| All reads           | 4n     | 4,525.811         | 40.963          | 1,257.508           | 1247,375                 |
| Passed reads        | 4n     | 4,043.192         | 41.244          | 732.658             | 1172,679                 |
| Miniasm/Minimap     | 4n     | 4.399             | 324.889         | 5,840.253           | 1147,459                 |
| Racon               | 4n     | 4.381             | 326.739         | 5,954.545           | 1161,2                   |
| Medaka              | 4n     | 4.426             | 325.453         | 5,956.772           | 1161,5                   |
| Purge dups_1x       | 1n     | 1.516             | 501.505         | 5,956.772           | 480,6                    |
| Purge dups_2x       | 1n     | 1.275             | 533.462         | 5,956.772           | 376,7                    |

Table 2 Pseudomolecule statistics for Pf\_1.0

| Pseudomolecule | Total size (bp) | %    |
|----------------|-----------------|------|
| Pf_1.0_chr1    | 66497422        | 18.1 |
| Pf_1.0_chr2    | 59585028        | 16.3 |
| Pf_1.0_chr3    | 39930086        | 10.9 |
| Pf_1.0_chr4    | 42034286        | 11.5 |
| Pf_1.0_chr5    | 31043513        | 8.5  |
| Pf_1.0_chr6    | 46922205        | 12.8 |
| Pf_1.0_chr7    | 36673485        | 10.0 |
| Pf_1.0_chr8    | 43818497        | 12.0 |
|                | 366504522       | 100  |

Table 3 Characterization of repetitive sequences of *P. fruticosa* 1.0

| Class                | Order                | Family           | No. of elements | Length (bp)      | Percentage of the genome (%) |      |
|----------------------|----------------------|------------------|-----------------|------------------|------------------------------|------|
| I (retrotransposons) | LTR                  | -                | 2142            | 472290           | 0.13                         |      |
|                      |                      | Cassandra        | 1852            | 910040           | 0.25                         |      |
|                      |                      | Caulimovirus     | 793             | 627333           | 0.17                         |      |
|                      |                      | <b>Copia</b>     | <b>41192</b>    | <b>27822528</b>  | <b>7.59</b>                  |      |
|                      |                      | <b>Gypsy</b>     | <b>68445</b>    | <b>76652400</b>  | <b>20.91</b>                 |      |
|                      |                      | Pao              | 344             | 96802            | 0.03                         |      |
|                      | LINE                 | I-Jockey         | 413             | 140619           | 0.04                         |      |
|                      |                      | L1               | 8844            | 4167515          | 1.14                         |      |
|                      |                      | L2               | 434             | 64430            | 0.02                         |      |
|                      |                      | Penelope         | 176             | 25448            | 0.01                         |      |
|                      |                      | RTE-BovB         | 516             | 87801            | 0.02                         |      |
|                      | SINE                 | -                | 457             | 62956            | 0.02                         |      |
|                      |                      | B2               | 1517            | 122973           | 0.03                         |      |
|                      |                      | tRNA             | 4593            | 509966           | 0.14                         |      |
|                      | II (DNA transposons) | TIR              | TcMar-Fot1      | 276              | 210022                       | 0.06 |
| TcMar-ISRm11         |                      |                  | 81              | 24496            | 0.01                         |      |
| Subclass I           |                      |                  | hAT-Ac          | 11533            | 3430880                      | 0.94 |
| hAT-Tag1             |                      |                  | 5353            | 1263452          | 0.34                         |      |
| hAT-Tip100           |                      |                  | 9680            | 2348735          | 0.64                         |      |
| PIF-Harbinger        |                      |                  | 14230           | 4268364          | 1.16                         |      |
| Subclass II          |                      | Crypton          | Crypton-H       | 237              | 195974                       | 0.05 |
|                      | Maverick             | Maverick         | 576             | 155067           | 0.04                         |      |
|                      | Helitron             | Helitron         | 5378            | 2220498          | 0.61                         |      |
|                      |                      | unknown/Helitron | 228             | 155920           | 0.04                         |      |
| Other                | -                    |                  | 13120           | 2310744          | 0.63                         |      |
|                      | Academ               |                  | 42              | 20252            | 0.01                         |      |
|                      | CMC-EnSpm            |                  | 16958           | 8879643          | 2.42                         |      |
|                      | Ginger               |                  | 325             | 77794            | 0.02                         |      |
|                      | MULE-MuDR            |                  | 17464           | 4459943          | 1.22                         |      |
| rRNA                 |                      |                  | 326             | 231622           | 0.06                         |      |
| Satellite            |                      |                  | 870             | 220737           | 0.06                         |      |
| Simple repeat        |                      |                  | 106232          | 4353840          | 1.19                         |      |
| Low complexity       |                      |                  | 19611           | 984829           | 0.27                         |      |
| <b>Unknown</b>       |                      |                  | <b>168094</b>   | <b>42110587</b>  | <b>11.49</b>                 |      |
| <b>SUM</b>           |                      |                  | <b>522228</b>   | <b>189663955</b> | <b>51.75</b>                 |      |

Table 4 Functional annotation results generated by interproscan using BRAKER & GeMoMa combination of ab-initio and homology-based structural gene annotation and statistics

| Interproscan annotations | No.           |  |
|--------------------------|---------------|--|
| Coils                    | 14627         |  |
| Gene3D                   | 82428         |  |
| Hamap                    | 1336          |  |
| PANTHER                  | 150554        |  |
| Pfam                     | 95569         |  |
| Phobius                  | 197895        |  |
| PIRSF                    | 5075          |  |
| PRINTS                   | 48332         |  |
| ProSitePatterns          | 19050         |  |
| ProSiteProfiles          | 52557         |  |
| SignalP_EUK              | 7914          |  |
| SMART                    | 42825         |  |
| SUPERFAMILY              | 64033         |  |
| TIGRFAM                  | 10603         |  |
| TMHMM                    | 59672         |  |
| <b>Sum</b>               | <b>852470</b> |  |

  

| Transcripts                       | No.   | %    |
|-----------------------------------|-------|------|
| total                             | 58880 |      |
| orthologs                         | 84524 | 100  |
| annotated                         | 73315 | 86.7 |
| annotated GO                      | 45196 | 53.5 |
| annotated pathways                | 5247  | 6.2  |
| domains                           | 62431 | 73.9 |
| Mean length (bp)                  | 3580  |      |
| Mean length of predicted proteins | 355   |      |

Table S1 Statistics of three different datasets for *P. fruticosa* generated with R10.3 PromethION cells (passed reads)

| Data set        | Ploidy | Number of reads | Total gigabases (Gb) | N50 length (bp) | Mean length (bp) | Max length (bp) | Mean q |
|-----------------|--------|-----------------|----------------------|-----------------|------------------|-----------------|--------|
| 200917_PAF21731 | 4n     | 1,498.775       | 43.7                 | 41.257          | 29.104           | 732.658         | 9.9    |
| 200922_PAF21408 | 4n     | 1,306.840       | 38.2                 | 41.499          | 29.251           | 529.628         | 10     |
| 200922_PAF21416 | 4n     | 1,237.604       | 35.4                 | 40.951          | 28.615           | 624.468         | 10     |
|                 | Sum    | 4,043.219       | 117.3                |                 |                  |                 |        |
|                 | Mean   | 1,347.740       | 39.1                 | 41.236          | 28.990           | 628.918         | 9.96   |
|                 | SD     | 135.304         | 4.2                  | 275             | 333              | 101.588         | 0.06   |

Table S2 Assembly statistics of tetraploid *P. fruticosa*

| x-coverage*                 | 20x             |             | 30x                  |                      | 50x             |               |
|-----------------------------|-----------------|-------------|----------------------|----------------------|-----------------|---------------|
| Assembly                    | MM** + 3x racon | + medaka    | MM** + 3x racon      | + medaka             | MM** + 3x racon | + medaka      |
| Final no. of seq.           | 3.413           | 3.460       | <b>4.381</b>         | <b>4.426</b>         | <u>4.662</u>    | <u>4.727</u>  |
| Seq. length characters (bp) |                 |             |                      |                      |                 |               |
| Cutoff                      | 69.042          |             | 63.011               |                      | 55.002          |               |
| Total                       | 989.839.499     | 988.573.324 | <b>1.162.237.634</b> | <b>1.161.456.281</b> | 1.212.434.570   | 1.211.504.091 |
| Mean                        | 290.020         | 285.715     | <b>265.290</b>       | <b>262.417</b>       | 260.067         | 256.294       |
| SD                          | 244.496         | 242.372     | 263.004              | 262.317              | 277.742         | 276.312       |
| Min                         | 4.077           | 149         | 2.605                | 73                   | 4.077           | 99            |
| Max                         | 3.012.684       | 3.006.345   | 5.954.545            | 5.956.772            | 6.443.975       | 6.446.220     |
| N25                         | 661.833         | 654.351     | 598.365              | 598.625              | 596.874         | 596.453       |
| N50                         | 368.933         | 367.276     | <b>326.739</b>       | <b>325.453</b>       | 314.773         | 313.883       |
| N75                         | 204.724         | 204.105     | 186.200              | 185.890              | 182.574         | 181.440       |
| N90                         | 144.538         | 144.375     | 135.082              | 134.607              | 133.209         | 132.581       |

\* fold coverage based on the estimation that the haploid genome size is ~300 Mbp

\*\* MM – Miniasm & Minimap

- 1 Table S3a Matrix of shared number of transcripts annotated from *P. avium* (Pa) and *P. persica* (Pp) to *P. fruticosa* (Pf) Pf\_1.0 within
- 2 each chromosomes

| Chromosomes | Pf_1        | Pf_2        | Pf_3        | Pf_4        | Pf_5        | Pf_6        | Pf_7        | Pf_8        |
|-------------|-------------|-------------|-------------|-------------|-------------|-------------|-------------|-------------|
| Pa_1        | <b>4254</b> | 361         | 306         | 232         | 179         | 283         | 277         | 316         |
| Pa_2        | 212         | <b>2255</b> | 131         | 151         | 142         | 193         | 131         | 154         |
| Pa_3        | 234         | 181         | <b>2030</b> | 184         | 118         | 152         | 131         | 118         |
| Pa_4        | 262         | 340         | 221         | <b>2045</b> | 163         | 242         | 188         | 206         |
| Pa_5        | 190         | 210         | 127         | 110         | <b>1765</b> | 127         | 111         | 124         |
| Pa_6        | 243         | 245         | 144         | 155         | 88          | <b>2667</b> | 138         | 171         |
| Pa_7        | 308         | 267         | 182         | 190         | 111         | 195         | <b>1883</b> | 192         |
| Pa_8        | 199         | 148         | 88          | 144         | 83          | 155         | 124         | <b>1955</b> |
| Sum         | 5902        | 4007        | 3229        | 3211        | 2649        | 4014        | 2983        | 3236        |

|      |             |             |             |             |             |             |             |             |
|------|-------------|-------------|-------------|-------------|-------------|-------------|-------------|-------------|
| Pp_1 | <b>5893</b> | 202         | 162         | 171         | 120         | 175         | 150         | 178         |
| Pp_2 | 126         | <b>3380</b> | 107         | 93          | 76          | 127         | 94          | 109         |
| Pp_3 | 145         | 146         | <b>3069</b> | 104         | 95          | 100         | 95          | 107         |
| Pp_4 | 115         | 139         | 89          | <b>2921</b> | 75          | 109         | 93          | 98          |
| Pp_5 | 93          | 103         | 68          | 56          | <b>2396</b> | 53          | 59          | 62          |
| Pp_6 | 143         | 164         | 92          | 108         | 62          | <b>3727</b> | 80          | 122         |
| Pp_7 | 109         | 117         | 72          | 73          | 53          | 63          | <b>2549</b> | 96          |
| Pp_8 | 124         | 111         | 73          | 74          | 57          | 83          | 72          | <b>2793</b> |
| Sum  | 6748        | 4362        | 3732        | 3600        | 2934        | 4437        | 3192        | 3565        |

3

4

5



6 Table S3b Matrix of shared number of transcript in percent annotated from *P. avium* (Pa) and *P. persica* (Pp) to *P. fruticosa* (Pf) Pf\_1.0  
 7 within each chromosomes

| Chromosomes | Pf_1         | Pf_2         | Pf_3         | Pf_4         | Pf_5         | Pf_6         | Pf_7         | Pf_8         |
|-------------|--------------|--------------|--------------|--------------|--------------|--------------|--------------|--------------|
| Pa_1        | <b>72.08</b> | 9.01         | 9.48         | 7.23         | 6.76         | 7.05         | 9.29         | 9.77         |
| Pa_2        | 3.59         | <b>56.28</b> | 4.06         | 4.70         | 5.36         | 4.81         | 4.39         | 4.76         |
| Pa_3        | 3.96         | 4.52         | <b>62.87</b> | 5.73         | 4.45         | 3.79         | 4.39         | 3.65         |
| Pa_4        | 4.44         | 8.49         | 6.84         | <b>63.69</b> | 6.15         | 6.03         | 6.30         | 6.37         |
| Pa_5        | 3.22         | 5.24         | 3.93         | 3.43         | <b>66.63</b> | 3.16         | 3.72         | 3.83         |
| Pa_6        | 4.12         | 6.11         | 4.46         | 4.83         | 3.32         | <b>66.44</b> | 4.63         | 5.28         |
| Pa_7        | 5.22         | 6.66         | 5.64         | 5.92         | 4.19         | 4.86         | <b>63.12</b> | 5.93         |
| Pa_8        | 3.37         | 3.69         | 2.73         | 4.48         | 3.13         | 3.86         | 4.16         | <b>60.41</b> |
| Pp_1        | <b>87.33</b> | 4.63         | 4.34         | 4.75         | 4.09         | 3.94         | 4.70         | 4.99         |
| Pp_2        | 1.87         | <b>77.49</b> | 2.87         | 2.58         | 2.59         | 2.86         | 2.94         | 3.06         |
| Pp_3        | 2.15         | 3.35         | <b>82.23</b> | 2.89         | 3.24         | 2.25         | 2.98         | 3.00         |
| Pp_4        | 1.70         | 3.19         | 2.38         | <b>81.14</b> | 2.56         | 2.46         | 2.91         | 2.75         |
| Pp_5        | 1.38         | 2.36         | 1.82         | 1.56         | <b>81.66</b> | 1.19         | 1.85         | 1.74         |
| Pp_6        | 2.12         | 3.76         | 2.47         | 3.00         | 2.11         | <b>84.00</b> | 2.51         | 3.42         |
| Pp_7        | 1.62         | 2.68         | 1.93         | 2.03         | 1.81         | 1.42         | <b>79.86</b> | 2.69         |
| Pp_8        | 1.84         | 2.54         | 1.96         | 2.06         | 1.94         | 1.87         | 2.26         | <b>78.35</b> |

8

9

10
